# Supplementary material for: Chirality sensing by a fluorescent binaphthocrown ether–polythiophene conjugate
Source: Royal Society of Chemistry journal article supplement (doi:10.1039/c2cc17007h), 2011-12-06
Supplement: c2cc17007h.pdf [file c2cc17007h.pdf]

**Electronic Supplementary Information**  
**for**

**Chirality sensing by fluorescent binaphthocrown ether-polythiophene conjugate**

**Gaku Fukuhara\* and Yoshihisa Inoue\***

Department of Applied Chemistry, Osaka University, 2-1 Yamada-oka, Suita 565-0871, Japan

Fax: 81 6 6879 7923; Tel: 81 6 6879 7922

*E-mail: gaku@chem.eng.osaka-u.ac.jp*

**General**

**Instruments.** UV/vis spectra were measured in a quartz cell (with light path of 1 cm) on a JASCO V-560 spectrometer equipped with an ETC-505T temperature controller. Fluorescence spectra were measured on a JASCO FP-6500 instrument. Fluorescence lifetimes were determined by the time-correlated single-photon-counting method on a Hamamatsu FL920S instrument equipped with a pulsed H<sub>2</sub> light source.

**Materials.** Fluorescence-free dichloromethane and (*R*)- and (*S*)- $\alpha$ -methyl-4-nitrobenzylamine hydrochloride (**MNBA**) were purchased from Aldrich, and used without further purifications. Binaphthocrown ether-polythiophene conjugate (**BPT**) was synthesized as reported previously and showed satisfactory agreement with the literature values.<sup>1</sup>

**UV/vis and fluorescence excitation spectra of BPT**

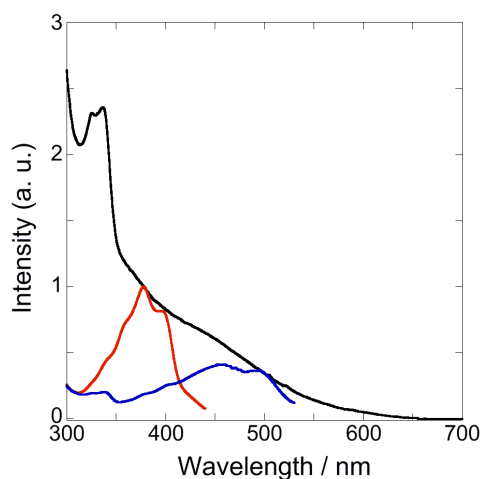

**Figure S1.** Normalized UV/vis spectrum (black) and the fluorescence excitation spectra observed at 460 nm (red) and 550 nm (blue) of **BPT** in dichloromethane.

<sup>1</sup> G. Fukuhara and Y. Inoue, *Chem. Eur. J.*, 2010, **16**, 7859.
